# Supplementary material for: Comparative Study of Interactions between Human cGAS and Inhibitors: Insights from Molecular Dynamics and MM/PBSA Studies
Source: PubMed Central journal article supplement (PMC7865699; doi:10.3390/ijms22031164), 2021-01-25
Supplement: ijms-22-01164-s001.pdf [file ijms-22-01164-s001.pdf]

## Supplementary Figures

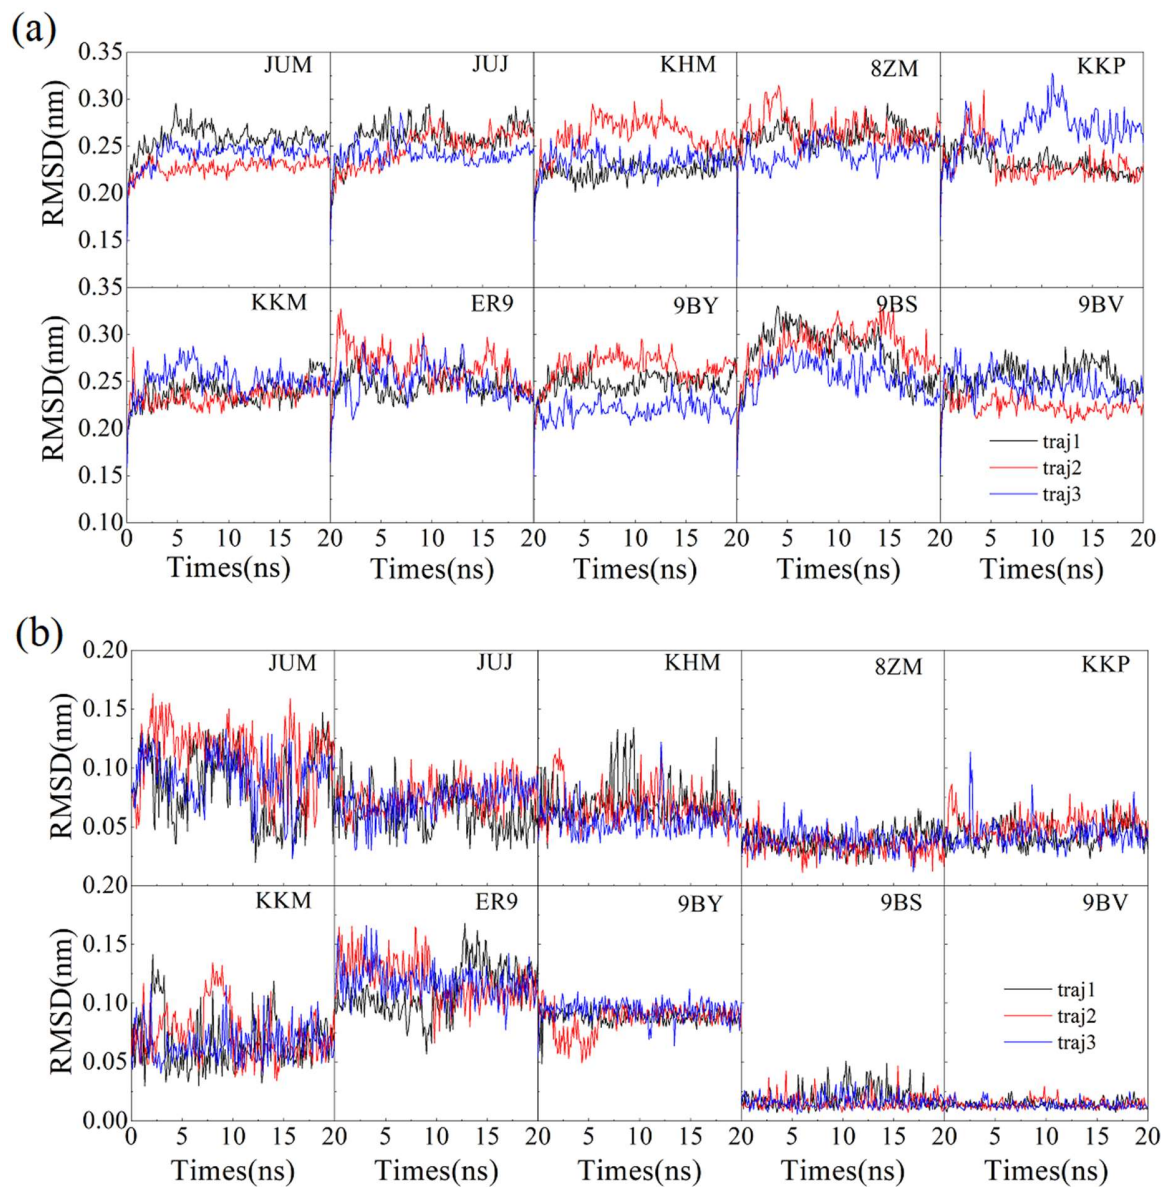

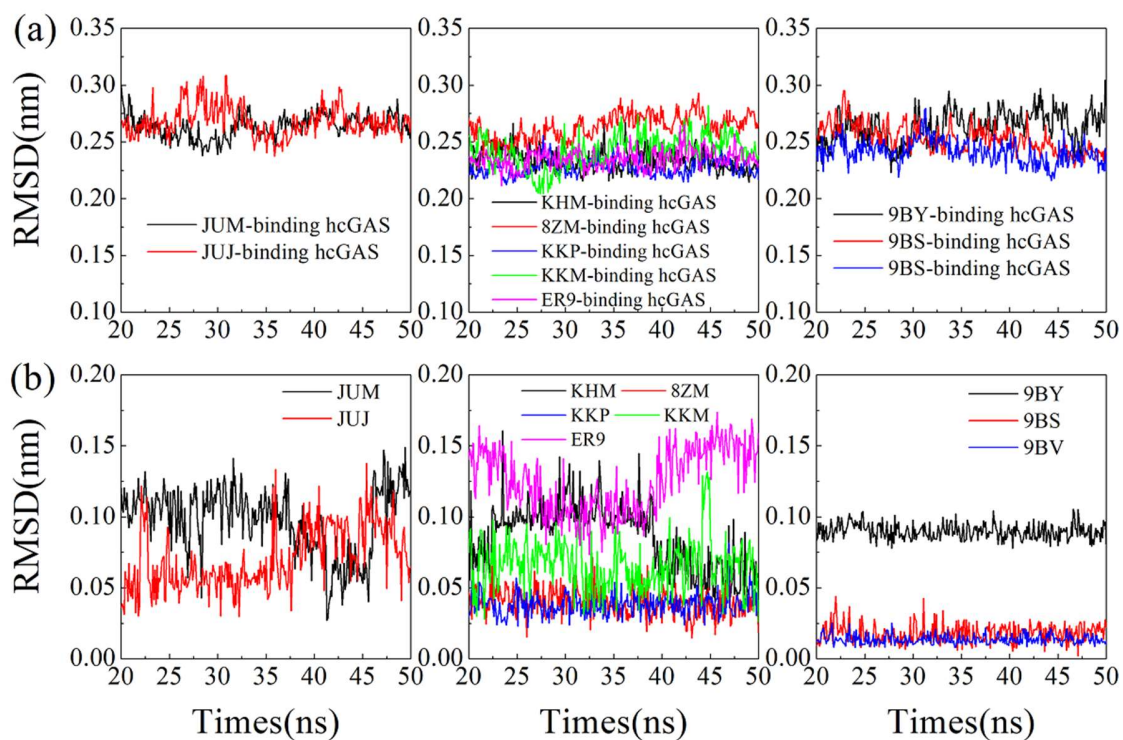

Figure S2. RMSD analyses for the extended 30 ns MD simulations on (a) hcGAS and (b) inhibitors.

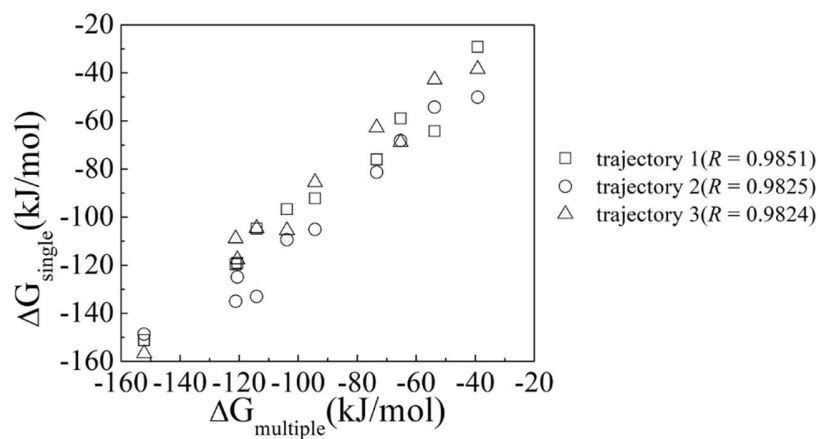

Figure S3. Correlation plot of the predicted binding free energies between multiple-trajectory and single-trajectory analysis. The correlation coefficients  $R$  are included in the parentheses.

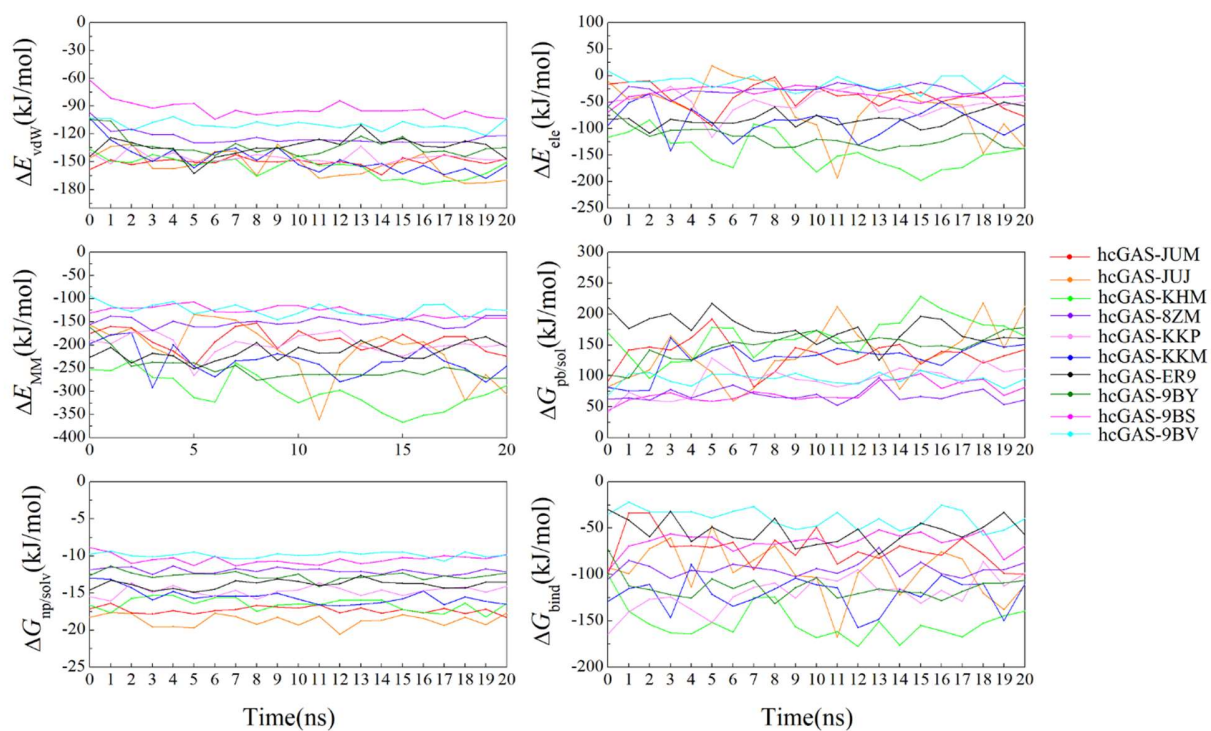

Figure S4. Distribution of all averaged energy components as a function of time, including  $\Delta E_{vdW}$ ,  $\Delta E_{ele}$ ,  $\Delta E_{MM}$ ,  $\Delta G_{pb/solv}$ ,  $\Delta G_{np/solv}$ , and  $\Delta G_{bind}$  of the ten hcGAS-inhibitor interactions.

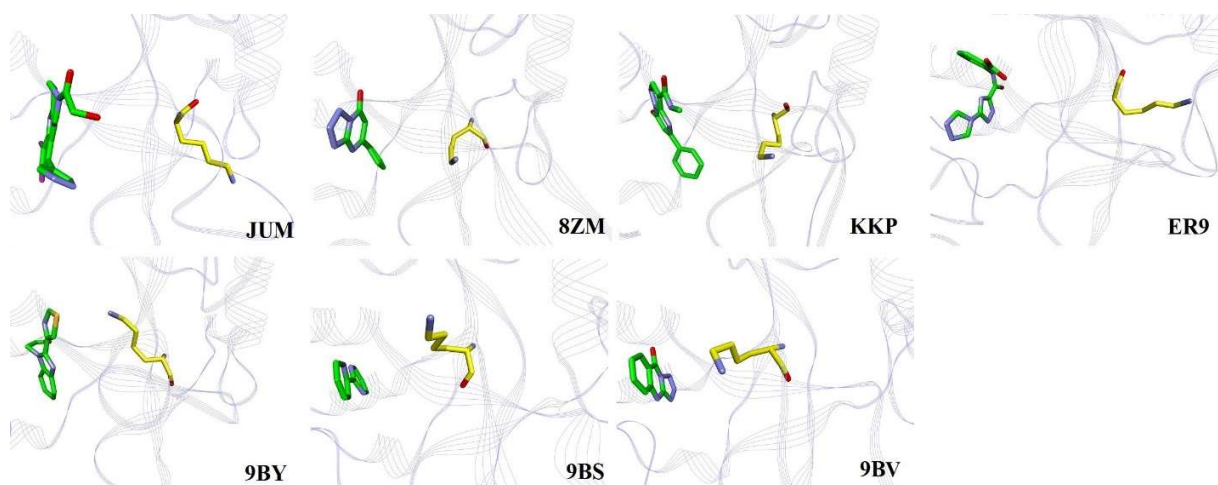

Figure S5. The binding modes between K362 and the inhibitors JUM, 8ZM, KKP, ER9, 9BY, 9BS, and 9BV. The C atoms of inhibitors and residues are shown in green and yellow, respectively. The N, O, and Cl atoms are shown in blue, red, and magenta, respectively. All the hydrogen atoms have been hidden for clarity. The proteins are displayed as purple line ribbon.

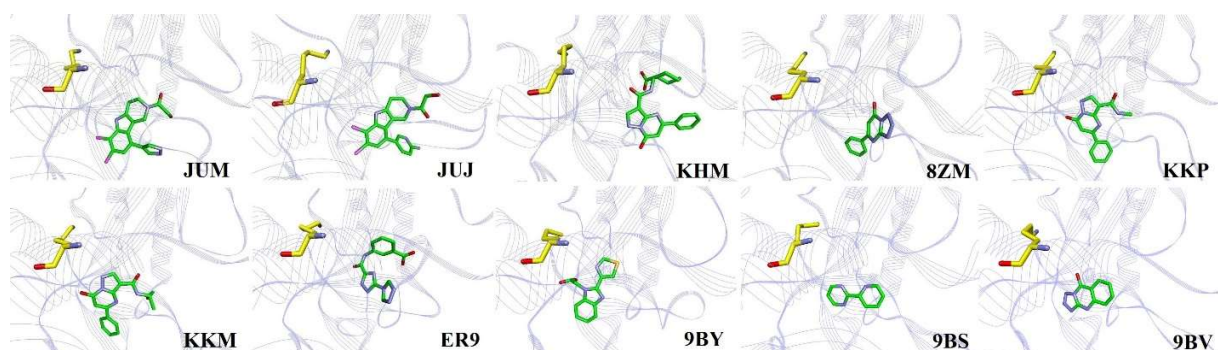

Figure S6. Binding of the ten inhibitors with K439. The C atoms of the inhibitors and K439 are shown in green and yellow, respectively. The atom and protein color schemes are identical to those shown in Figure S3.



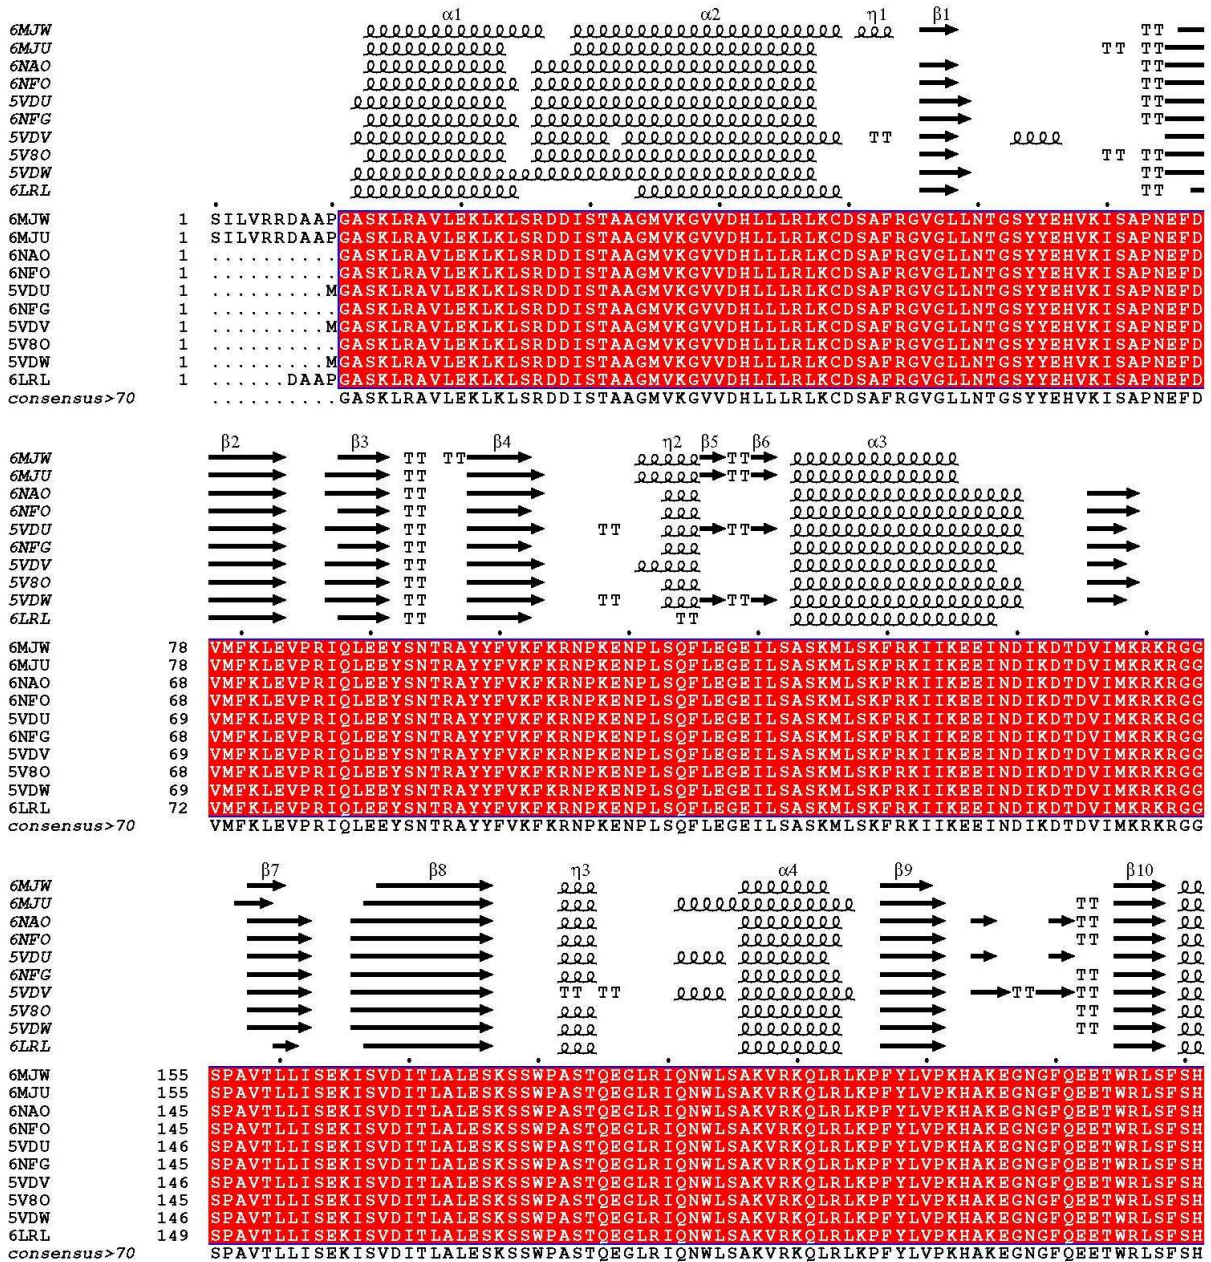

Figure S7 Continued.

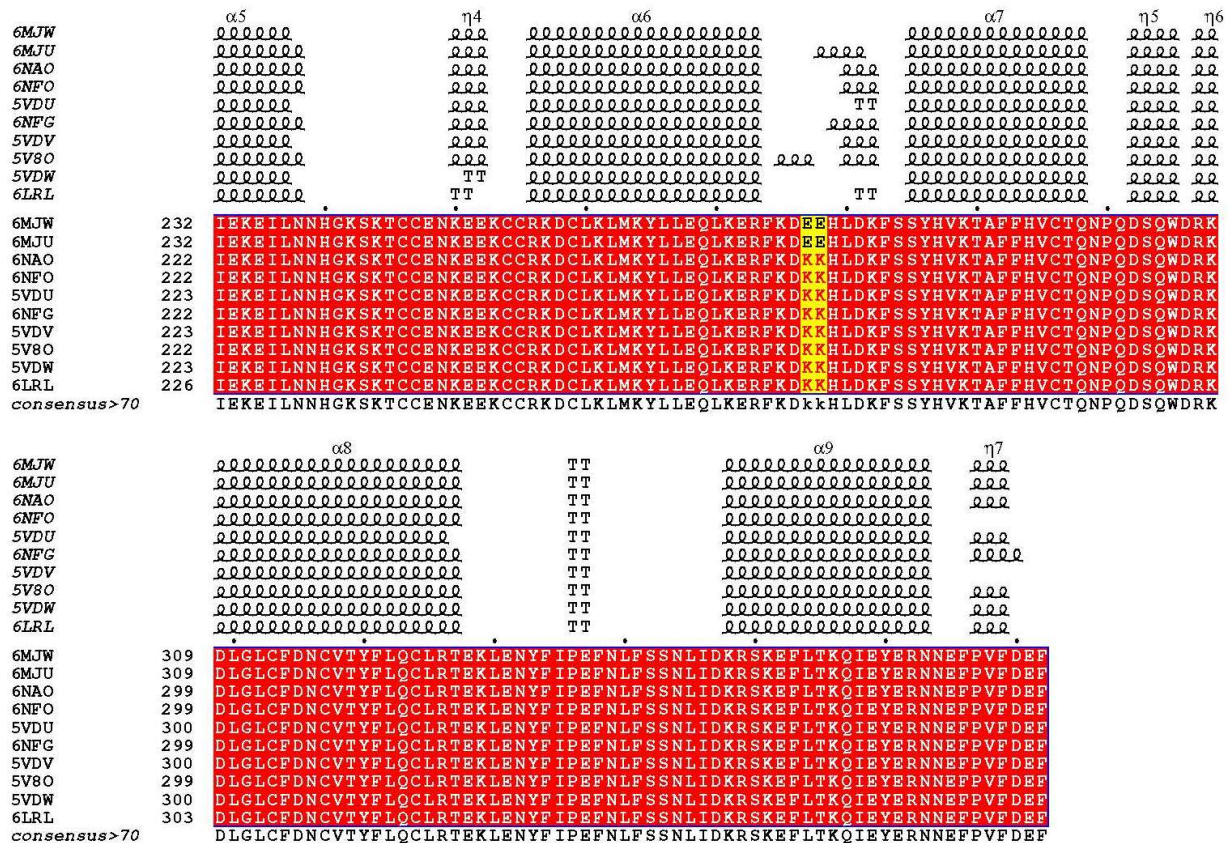

Figure S7. Multiple sequence alignment of the first ten hcGAS proteins obtained using the T-Coffee method. Red boxes represent the identical overlapping regions. The sequences inside the yellow background show the different sequence regions. The secondary structural elements above the aligned sequences were analyzed using ESPrift 3.0 webserver. The medium squiggles ( $\alpha$ ), small squiggles ( $\eta$ ), arrows ( $\beta$ ), and TT indicate the  $\alpha$ -helices, 310-helices,  $\beta$ -strands, and  $\beta$ -turns, respectively.

## Supplementary Tables

Table S1. Experimental data regarding binding of hcGAS with the various inhibitors.

| No. | PDB ID | Inhibitor name |             | $K_d/\mu\text{M}$ | $\text{IC}_{50}/\mu\text{M}$ | Category |
|-----|--------|----------------|-------------|-------------------|------------------------------|----------|
|     |        | PDB            | reference   |                   |                              |          |
| 1   | 6MJU   | JUM            | G108        | –                 | 0.0275                       | I        |
| 2   | 6MJW   | JUJ            | G150        | –                 | 0.0102                       | I        |
| 3   | 6NAO   | KHM            | PF-06928215 | 0.2               | 2.0 or 4.9                   | II       |
| 4   | 5V8O   | 8ZM            | compound 15 | 171               | 78                           | II       |
| 5   | 6NFG   | KKP            | compound 16 | 78                | 69 or 125                    | II       |
| 6   | 6NFO   | KKM            | compound 19 | 2.7               | 8.1 or 17.5                  | II       |
| 7   | 6LRL   | ER9            | compound S2 | –                 | $13.1 \pm 0.09$              | II       |
| 8   | 5VDW   | 9BY            | compound F1 | $236 \pm 19$      | –                            | III      |
| 9   | 5VDU   | 9BS            | compound F2 | $64 \pm 3$        | –                            | III      |
| 10  | 5VDV   | 9BV            | compound F3 | $80 \pm 4$        | –                            | III      |

Table S2. The binding free energy (kJ/mol) estimated using MM/PBSA followed with energy decomposition components from single trajectory 1.

| Inhibitor | $\Delta E_{\text{vdW}}$ | $\Delta E_{\text{ele}}$ | $\Delta G_{\text{pb/solv}}$ | $\Delta G_{\text{np/solv}}$ | $\Delta G_{\text{pb}}$ | $\Delta G_{\text{np}}$ | $\Delta G_{\text{bind}}$ |
|-----------|-------------------------|-------------------------|-----------------------------|-----------------------------|------------------------|------------------------|--------------------------|
| JUM       | -146.4                  | -47.1                   | 134.7                       | -17.2                       | 87.6                   | -163.6                 | -76.0                    |
| JUJ       | -153.4                  | -59.0                   | 134.5                       | -18.7                       | 75.5                   | -172.1                 | -96.7                    |
| KHM       | -155.1                  | -106.9                  | 127.1                       | -16.6                       | 20.2                   | -171.8                 | -151.2                   |
| 8ZM       | -123.6                  | -23.1                   | 66.6                        | -12.1                       | 43.5                   | -135.7                 | -92.2                    |
| KKP       | -146.3                  | -43.3                   | 85.8                        | -14.7                       | 42.5                   | -161.1                 | -119.1                   |
| KKM       | -144.2                  | -98.3                   | 138.2                       | -15.0                       | 39.9                   | -159.2                 | -119.6                   |
| ER9       | -153.2                  | -91.8                   | 195.9                       | -15.0                       | 104.1                  | -168.2                 | -64.2                    |
| 9BY       | -141.6                  | -149.6                  | 199.6                       | -13.0                       | 50.1                   | -154.7                 | -104.8                   |
| 9BS       | -94.3                   | -40.0                   | 85.4                        | -10.2                       | 45.3                   | -104.4                 | -58.9                    |
| 9BV       | -110.8                  | -10.0                   | 101.4                       | -9.8                        | 91.4                   | -120.6                 | -29.2                    |

Table S3. The binding free energy (kJ/mol) estimated using MM/PBSA followed with energy decomposition components from single trajectory 2.

| Inhibitor | $\Delta E_{\text{vdW}}$ | $\Delta E_{\text{ele}}$ | $\Delta G_{\text{pb/solv}}$ | $\Delta G_{\text{np/solv}}$ | $\Delta G_{\text{pb}}$ | $\Delta G_{\text{np}}$ | $\Delta G_{\text{bind}}$ |
|-----------|-------------------------|-------------------------|-----------------------------|-----------------------------|------------------------|------------------------|--------------------------|
| JUM       | -150.1                  | -58.5                   | 143.4                       | -16.8                       | 84.9                   | -167.0                 | -81.3                    |
| JUJ       | -167.9                  | -67.6                   | 144.6                       | -18.6                       | 77.0                   | -186.5                 | -109.4                   |
| KHM       | -130.4                  | -161.5                  | 159.2                       | -15.4                       | -2.3                   | -145.8                 | -148.7                   |
| 8ZM       | -120.4                  | -18.3                   | 45.3                        | -11.5                       | 27.0                   | -132.0                 | -105.1                   |
| KKP       | -142.4                  | -82.0                   | 114.3                       | -14.9                       | 32.3                   | -157.3                 | -124.9                   |
| KKM       | -149.3                  | -117.5                  | 148.5                       | -16.4                       | 30.9                   | -165.7                 | -135.0                   |
| ER9       | -113.6                  | -93.1                   | 165.0                       | -12.5                       | 71.8                   | -126.0                 | -54.3                    |
| 9BY       | -134.4                  | -129.4                  | 143.8                       | -12.6                       | 14.4                   | -146.9                 | -133.0                   |
| 9BS       | -98.8                   | -32.6                   | 73.9                        | -10.7                       | 41.4                   | -109.5                 | -68.2                    |
| 9BV       | -107.0                  | -22.9                   | 89.3                        | -9.9                        | 66.4                   | -116.9                 | -50.1                    |

Table S4. The binding free energy (kJ/mol) estimated using MM/PBSA followed with energy decomposition components from single trajectory 3.

| Inhibitor | $\Delta E_{\text{vdW}}$ | $\Delta E_{\text{ele}}$ | $\Delta G_{\text{pb/solv}}$ | $\Delta G_{\text{np/solv}}$ | $\Delta G_{\text{pb}}$ | $\Delta G_{\text{np}}$ | $\Delta G_{\text{bind}}$ |
|-----------|-------------------------|-------------------------|-----------------------------|-----------------------------|------------------------|------------------------|--------------------------|
| JUM       | -154.1                  | -16.1                   | 125.8                       | -17.9                       | 109.7                  | -172.0                 | -62.7                    |
| JUJ       | -155.9                  | -43.1                   | 111.6                       | -17.9                       | 68.5                   | -173.8                 | -105.5                   |
| KHM       | -181.6                  | -163.7                  | 206.1                       | -17.5                       | 42.4                   | -199.1                 | -156.6                   |
| 8ZM       | -128.3                  | -38.7                   | 93.9                        | -12.4                       | 55.3                   | -140.6                 | -85.5                    |
| KKP       | -147.9                  | -33.2                   | 77.7                        | -14.7                       | 44.5                   | -162.5                 | -117.6                   |
| KKM       | -149.1                  | -46.9                   | 102.1                       | -15.2                       | 55.2                   | -164.3                 | -108.9                   |
| ER9       | -135.3                  | -60.4                   | 167.3                       | -14.1                       | 106.9                  | -149.4                 | -42.8                    |
| 9BY       | -121.9                  | -73.3                   | 102.9                       | -12.4                       | 29.7                   | -134.3                 | -104.6                   |
| 9BS       | -85.7                   | -32.7                   | 60.5                        | -10.5                       | 27.8                   | -96.2                  | -68.8                    |
| 9BV       | -112.6                  | -10.0                   | 93.9                        | -9.9                        | 83.8                   | -122.5                 | -38.4                    |



Table S5. Binding free energy (kJ/mol) of the selected residues in hcGAS within 0.6 nm of the corresponding inhibitors.

| Residue | JUM   | JUJ    | KHM    | 8ZM    | KKP    | KKM    | ER9   | 9BY    | 9BS    | 9BV   |
|---------|-------|--------|--------|--------|--------|--------|-------|--------|--------|-------|
| M229    | -0.47 | -0.21  | -0.45  | -0.22  | -0.48  | -0.43  | -0.13 | -0.43  | -0.37  | -0.17 |
| A247    | 1.17  | 1.46   | -0.30  | 0.22   | 3.86   | 0.94   | -0.05 | -1.41  | -0.42  | -0.58 |
| Y248    | 0.87  | 1.56   | 0.74   | -0.26  | 1.26   | 0.70   | -0.47 | -0.72  | -0.80  | -0.24 |
| V360    | -0.90 | -1.01  | -0.55  | -0.36  | -1.51  | -0.86  | -0.10 | -0.58  | -0.84  | -0.31 |
| K362    | -4.91 | -11.61 | -24.90 | -10.08 | -11.84 | -16.84 | -1.38 | -9.14  | -8.45  | -3.26 |
| H363    | -0.48 | -4.23  | 2.43   | 0.95   | 0.57   | 0.87   | -0.54 | 0.57   | 0.63   | 0.60  |
| R376    | -7.88 | -14.38 | -32.09 | -19.60 | -24.33 | -26.80 | -7.45 | -22.63 | -14.36 | -9.90 |
| L377    | 1.24  | 3.43   | 1.69   | 7.35   | 4.13   | 1.53   | 1.61  | 3.54   | 5.49   | 2.67  |
| S378    | 0.83  | -0.22  | -0.96  | -0.57  | -1.65  | -0.28  | 0.35  | -3.16  | -1.13  | -0.55 |
| F379    | 0.17  | -0.23  | -1.47  | -0.59  | -0.87  | -0.87  | 0.05  | -5.18  | -1.22  | -1.41 |
| S380    | -0.41 | -0.34  | -0.58  | -0.21  | -0.68  | -1.09  | 0.17  | -1.12  | -0.98  | -0.42 |
| E383    | 6.85  | 6.78   | 16.30  | 5.70   | 9.94   | 23.45  | 1.60  | 13.34  | 11.63  | 12.68 |
| K432    | -1.12 | -3.61  | 0.26   | -4.16  | -3.63  | -0.67  | -3.51 | -0.29  | -0.44  | 1.66  |
| F433    | -0.37 | 0.06   | -0.96  | -0.92  | -0.61  | -0.78  | 0.54  | -0.76  | -0.51  | -0.76 |
| S434    | -1.61 | -2.18  | 0.41   | -1.45  | -0.54  | -1.22  | -1.79 | 0.74   | 0.24   | 1.06  |
| S435    | -0.89 | -0.65  | -1.27  | -0.84  | -0.70  | -1.40  | -0.51 | -0.15  | -0.20  | 0.31  |
| Y436    | -7.00 | -6.15  | -8.98  | -13.03 | -8.00  | -13.09 | -7.08 | -9.07  | -3.92  | -9.09 |
| H437    | -0.65 | -2.99  | -0.99  | -5.07  | -1.82  | -1.66  | -2.57 | -0.77  | -0.61  | -0.26 |
| K439    | -6.12 | -6.13  | -11.72 | -5.42  | -8.86  | -12.81 | -1.73 | -7.25  | -7.71  | -2.94 |
| N482    | 3.47  | 3.12   | -1.08  | 0.97   | -1.25  | -0.64  | 0.04  | -0.62  | -0.14  | -1.25 |
| F484    | -1.63 | -0.87  | -1.05  | -0.89  | -0.97  | -1.77  | -0.20 | -2.24  | -1.02  | -2.19 |
| I485    | -0.97 | -0.43  | -1.25  | -1.60  | -2.09  | -2.32  | -0.03 | -2.00  | -1.18  | -1.50 |
| F488    | -2.28 | -1.13  | -5.30  | -2.10  | -4.15  | -2.31  | -0.64 | -2.17  | -2.51  | -1.90 |
| L490    | -2.25 | -1.40  | -2.68  | -2.99  | -2.13  | -0.65  | -0.82 | -1.66  | -2.78  | -2.19 |
| L495    | -1.84 | -2.53  | -5.24  | -2.09  | -1.84  | -1.88  | -0.48 | -1.03  | -1.36  | -0.33 |
| I496    | -0.08 | -0.39  | -0.33  | -0.24  | -0.31  | -0.27  | -0.08 | -0.03  | -0.10  | 0.02  |

Table S6. The missing residues of the ten hcGAS systems and summary of the template and zDOPE score for each target.

| target | template   | zDOPE | Missing residues                                                                          |
|--------|------------|-------|-------------------------------------------------------------------------------------------|
| 6MJW   | 4O68, 4KM5 | -1.52 | 161, 255–259, 288–303, 312–315, 365–370, 521–522                                          |
| 6MJU   | 4O68, 4KM5 | -1.51 | 255–259, 288–303, 311–315, 365–368, 522                                                   |
| 6NFO   | 4KM5       | -1.73 | 254–259, 302–305, 365–567, 521–522                                                        |
| 6NFG   | 4KM5       | -1.81 | 255–260, 303–306, 367–369, 521–522                                                        |
| 6NAO   | 4KM5       | -1.79 | 303–306, 522                                                                              |
| 5V8O   | 4O67, 4O69 | -1.81 | 214–216, 303–306, 366–369, 522                                                            |
| 5VDV   | 4O67, 4O69 | -1.76 | 303–306, 521–522                                                                          |
| 5VDW   | 4O67, 4O69 | -1.84 | 521–522                                                                                   |
| 5VDU   | 4O67, 4O69 | -1.80 | 521–522                                                                                   |
| 6LRL   | 4O68, 4KM5 | -1.70 | 157–160, 174, 198, 210, 216–220, 254–258, 261,<br>289–292, 299–306, 315, 365–370, 521–522 |
